# Supplementary material for: Effect of Moderate Electric Fields on the Physical and Chemical Characteristics of Cheese Emulsions
Source: MDPI journal article supplement (doi:10.3390/gels9090747), 2023-09-14
Supplement: s1 [file s1]

## Supplementary Information

**Table S1.** Component concentration of ohmic (OH) and water bath (WB)- treated cheeses (TC).

| Component   | WB_TC      | OH_TC      |
|-------------|------------|------------|
| DM, %       | 52.0 ± 0.3 | 51.1 ± 0.9 |
| Protein, %  | 27.9 ± 1.4 | 28.8 ± 1.0 |
| Fat, %      | 18.8 ± 1.7 | 16.7 ± 1.2 |
| Ca, mg/100g | 781 ± 27   | 788 ± 37   |
| P, mg/100g  | 571 ± 27   | 586 ± 35   |

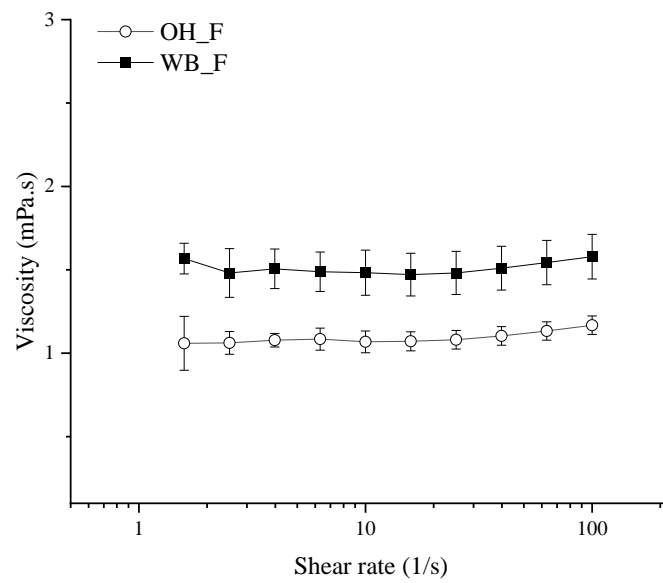

**Figure S1.** Apparent viscosity results of feeds prepared with different pre-treated cheeses.
